# Supplementary material for: High Mobility Group AT-Hook 2 (HMGA2) Oncogenicity in Mesenchymal and Epithelial Neoplasia
Source: PubMed Central journal article supplement (PMC7246488; doi:10.3390/ijms21093151), 2020-04-29
Supplement: ijms-21-03151-s001.pdf [file ijms-21-03151-s001.pdf]

Supplementary Table S1: Chromosomal rearrangements involving HMGA2 in human mesenchymal tumors.

| Tumor Type | [Refs] | Chromosomal Translocation Partners | Chromosomal Rearrangement                                                                                                                                                  |
|------------|--------|------------------------------------|----------------------------------------------------------------------------------------------------------------------------------------------------------------------------|
| Lipoma     | [1]    | 1                                  | t(1;12)(p36;q15)                                                                                                                                                           |
|            | [1]    |                                    | t(1;12)(p36;q14-15)                                                                                                                                                        |
|            | [1]    |                                    | t(1;12)(p34;q15)                                                                                                                                                           |
|            | [1]    |                                    | ins(12;1)(q15;p33p22)                                                                                                                                                      |
|            | [1]    |                                    | t(1;12;2)(p33;q15;q37)                                                                                                                                                     |
|            | [1]    |                                    | <b>t(1;12)(p33;q15),t(3;5)(p23;q13)</b>                                                                                                                                    |
|            | [1]    |                                    | t(1;12)(p33;q15)                                                                                                                                                           |
|            | [1]    |                                    | t(1;12)(p32;q15)                                                                                                                                                           |
|            | [1]    |                                    | <b>t(1;12)(p32;q13),t(6;19;8)(q13;q13;p21),der(10)t(10;11)(p13;q21),der(11)t(11;16)(q21;q13),der(16)t(16;17)(p11;p11)del(16)(q13),der(17)t(16;17)(p11;p11)</b>             |
|            | [1]    |                                    | <b>[t(1;12)(p36.1;q13)],t(der(1);5;15)(der(1)(15qter→15q24::12q15→12q13::1p36.1→cen→1qter),der(5)(5pter→cen→5q33::12q15→12qter),der(15)(15pter→cen→15q24::5q33→5qter))</b> |
|            | [1-3]  |                                    | t(1;12)(p32;q14)                                                                                                                                                           |
|            | [1]    |                                    | t(1;12)(p22;q14)                                                                                                                                                           |
|            | [1]    |                                    | ins(12;1)(q13;p12p22)                                                                                                                                                      |
|            | [1]    |                                    | der(1)ins(1;12)(q21;q21q13)t(1;12)(q32;q21), der(12)t(1;12)(q32;q13)                                                                                                       |
|            | [1]    |                                    | t(1;12)(q23;q15)                                                                                                                                                           |
|            | [1]    |                                    | t(1;12)(q32;q14)                                                                                                                                                           |
|            | [1]    |                                    | der(1)inv(1)(p22q42) <b>t(1;12)(q44;q15),?t(3;4)(p25;p13),del(12)(q13)</b>                                                                                                 |
|            | [1]    |                                    | <b>der(1)t(1;12)(q42;q15), der(12)t(12;14)(q15;q21)t(1;14)(q42;q24),del(14)(q21q24)</b>                                                                                    |
|            | [4]    |                                    | t(1;12)(p33;q14)                                                                                                                                                           |
|            |        |                                    | t(1;12)(p32;q13q15)                                                                                                                                                        |
|            | [3]    |                                    | t(1;12)(p32;q14)                                                                                                                                                           |
|            | [3]    |                                    | t(1;12)(p32;q14),del(13)(q14q31)                                                                                                                                           |
|            | [3]    |                                    | t(1;12)(p32;q14),t(1;20)(q32;p13)                                                                                                                                          |
|            | [3]    |                                    | t(1;12)(p32;q14),t(11;12)(q13;p13)                                                                                                                                         |
|            | [3]    |                                    | t(1;12)(p32;q14), del(1)(p32),t(2;11)(q21;p15)                                                                                                                             |
|            | [3]    |                                    | inv(1)(p32q11),t(1;12)(q11;q14),t(17;18)(q11;q23)                                                                                                                          |
|            | [4]    |                                    | -1,+der(1)ins(1;?)(p21;?),-12, <b>+der(12)ins(12;?)(q13;?)</b>                                                                                                             |
|            | [4]    |                                    | -1,+der(1)ins(1;12)(p32;q13q15),-12,+der(12)(12qter→12q24.3::12q15→12q24.3::12p11.2→cen→12q13::12p11.2→12pter)                                                             |
|            | [4]    | 2                                  | t(2;12)(p21-22;q13-14)                                                                                                                                                     |
|            | [1]    |                                    | t(2;12)(p21;q15)                                                                                                                                                           |
|            | [4]    |                                    | t(2;12)(q11.2;p11.2),t(19;20)(q13.1;p13)                                                                                                                                   |
|            |        |                                    | t(2;12)(q11.2;q15 or 21),del(13)(q12q22)                                                                                                                                   |
|            | [4]    |                                    | del(1)(q31),t(2;12),t(3;11),+r                                                                                                                                             |
|            | [1]    |                                    | der(2)t(2;6)(q33;q12),der(6)t(6;12)(q12;q11) <b>ins(12;2)(q13;q33q37),del(12)(q11)/46,idem,t(7;12)(p15;q24)</b>                                                            |

|              |   |                                                                                                                                                                                     |
|--------------|---|-------------------------------------------------------------------------------------------------------------------------------------------------------------------------------------|
| [1]          |   | t(2;12)(q35;q15)                                                                                                                                                                    |
| [1]          |   | t(2;12)(q35;q15)/46,XY, der(1)t(1;12)(p36;q13)t(2;12), der(2)t(2;12), der(12)t(1;12)                                                                                                |
| [1]          |   | <b>t(2;12)(q35;q15)</b> , der(4)t(4;20)(q28;q11), der(11)t(11;13)(p11;q14)t(1;11)(p34;q13), der(13)t(4;13)(q28;q14), der(17)t(11;17)(q23;p11)del(11)(q13), der(20)t(17;20)(p11;q11) |
| [1]          |   | <b>t(2;12)(q35;q15)</b> , der(3)inv(3)(p21q12)add(3)(p21)add(3)(q23)del(3)(q12q23), der(6)t(6;13)(q14;p11), -13, der(17)t(3;17)(p26;q23), der(20)t(17;20)(q23;p13)                  |
| [1]          |   | t(2;12)(q36;q14)                                                                                                                                                                    |
| [1]          |   | t(2;12)(q37;q13)                                                                                                                                                                    |
| [5, 6]       |   | t(2;12)(q37;q14)                                                                                                                                                                    |
| [1]          |   | der(2)t(2;10)(q13;q24), der(7)t(2;7)(q13;q36) <b>t(2;12)(q37;q15)</b> , <b>add(12)(q15)</b>                                                                                         |
| [1, 4, 7-12] | 3 | t(3;12)(q28;q14)                                                                                                                                                                    |
| [1]          | 3 | t(2;3)(p21;q29), <b>t(3;12)(p14;q15)</b>                                                                                                                                            |
| [1]          | 3 | der(2)t(2;3)(p23;p21), der(3)inv(3)(p13p21)t(3;12)(p13;q15) , <b>der(12)t(2;12)(p23;q15)</b>                                                                                        |
| [1]          | 3 | der(3)ins(3;12)(q13-21;q12q14)del(3)(q13-21q27), der(12)ins(12;3)(q12;q13-21q27) del(12)(q12q14)                                                                                    |
| [1]          | 3 | ins(12;3)(q15;q13-21q27-28)                                                                                                                                                         |
| [1]          | 3 | ins(12;3)(q15;q23q25)/46, idem, ins(1;10)(p12;q11q25)                                                                                                                               |
| [1]          | 3 | t(3;12)(q25;q15)                                                                                                                                                                    |
| [1]          | 3 | t(3;12)(q26;q15)                                                                                                                                                                    |
| [1]          | 3 | t(3;12)(q27;q15)                                                                                                                                                                    |
| [1, 11]      | 3 | t(3;12)(q27;q13)                                                                                                                                                                    |
| [2]          | 3 | t(3;12)(q27;q13-q15)                                                                                                                                                                |
| [1]          | 3 | t(3;12)(q28;q13-q15)                                                                                                                                                                |
| [4]          | 3 | t(3;12)(q28;q14), t(3;17)(q12;q11.2)                                                                                                                                                |
| [1, 4]       | 3 | t(3;12)(q27;q14)                                                                                                                                                                    |
| [1]          | 3 | t(1;7)(q25;q22), <b>t(3;12)(q27;q14)</b>                                                                                                                                            |
| [1]          | 3 | <b>t(3;12)(q27;q14)</b> , t(10;17;17)(q24;p11;p13)                                                                                                                                  |
| [1]          | 3 | der(3)ins(3)(p21q25q27) <b>t(3;12)(q27;q15)</b> , <b>der(12)t(3;12)</b>                                                                                                             |
| [1]          | 3 | t(3;8)(q13;q22), <b>t(3;12)(q27;q15)</b>                                                                                                                                            |
| [1]          | 3 | <b>t(3;12)(q27;q14)</b> / del(1)(p32), <b>der(3)t(3;12)</b> , <b>der(12)t(3;12) add(12)(p12)</b> , +22                                                                              |
| [1]          | 3 | der(3)t(3;9)(p21;q34) <b>t(3;12)(q27;q15)</b> , t(7;15)(q22;q24), der(9)t(3;9), <b>der(12)t(3;12)</b> , <b>del(13)(q12q31)</b>                                                      |
| [1]          | 3 | der(3)t(3;11)(p14;q21) <b>t(3;12)(q27;q15)</b> , der(11)t(3;11), <b>der(12)t(3;12)</b>                                                                                              |
| [1]          | 3 | <b>t(3;12)(q27;q15)</b> / idem, t(1;11)(p36;q23), t(4;20)(p14;p11)                                                                                                                  |
| [1]          | 3 | der(3)t(3;10)(p21;q11)t(3;20)(q27;q11), der(10)t(3;10), <b>der(12)t(3;12)(q27;q14)</b> , der(20)t(12;20)(q14;q11) /idem, <b>t(2;12)(p24;q15)</b>                                    |
| [1]          | 3 | t(3;12)(q27-28;q13-15)                                                                                                                                                              |
| [1]          | 3 | t(3;12)(q27-28;q14-15)                                                                                                                                                              |
| [1]          | 3 | t(3;12)(q28;q15)                                                                                                                                                                    |

|                   |   |                                                                                                                                                                                                                                                                              |
|-------------------|---|------------------------------------------------------------------------------------------------------------------------------------------------------------------------------------------------------------------------------------------------------------------------------|
| [1]               | 3 | t(3;12)(q28;q13)                                                                                                                                                                                                                                                             |
| [1]               | 3 | <b>t(3;12)(q28;q15)/46</b> ,idem,t(1;6)(p36;q25)                                                                                                                                                                                                                             |
| [1]               | 3 | <b>t(3;12)(q28;q14)/47</b> ,idem,+5                                                                                                                                                                                                                                          |
| [1]               | 3 | der(3)inv(3)(p21q11) <b>t(3;12)(q28;q14)</b> ,t(5;15)(q14;p11),<br><b>der(12)t(3;12)(q28;q14)</b> ,add(13)(q12) ,der(16)t(13;16)(q13;p11)<br>/add(3)(q29),der(3)inv(3)del(3)(q2?1q2?8) <b>t(3;12)</b> , <b>t(5;15)</b> , <b>der(12)t(3;12)</b> ,add(13) ,<br>der(16)t(13;16) |
| [1]               | 3 | t(3;12)(q29;q14)                                                                                                                                                                                                                                                             |
| [4]               | 3 | <b>[inv(12)(p11.2q13)]</b> ,+t(3;inv(12))(der(3)(12pter→12p11.2::12q15→12q13::3p21→cen→3qter);der(12)(12qter<br>→12q15::12p11.2→cen→12q13::3p21→3pter))                                                                                                                      |
| [11]              | 3 | dup(3)(p26p25), <b>t(3;12)(q27;q14)</b> ,dup(22)(q11q11)                                                                                                                                                                                                                     |
| [4]               | 4 | Ins(4;12)(q21;q11q15)                                                                                                                                                                                                                                                        |
| [4]               | 4 | -4,+der(4)t(4;12)(4p16→cen→4q22::12q14→12qter),-<br>12,+der(12)t(4;12)(4qter→4q28::12p13→cen→12q14::4q22→4q28::12p13→12pter)                                                                                                                                                 |
| [1]               | 4 | ins(4;12)(p16;q24q15) ,+9                                                                                                                                                                                                                                                    |
| [1]               | 4 | <b>der(4)t(4;12)(q24;q14)</b> ,der(5)ins(5;4)(q13;q24q27),<br><b>der(12)t(4;12)(q27;q14)</b>                                                                                                                                                                                 |
| [1]               | 4 | t(4;12)(q27;q15)                                                                                                                                                                                                                                                             |
| [1, 2,<br>11, 13] | 5 | t(5;12)(q33;q15)                                                                                                                                                                                                                                                             |
| [13]              | 5 | t(3;7)(p13;p15), <b>t(5;12)(q33;q14)</b>                                                                                                                                                                                                                                     |
| [13]              | 5 | <b>t(5;12)(q33;q14)</b> /idem,der(14;21)(q10;q10)                                                                                                                                                                                                                            |
| [13]              | 5 | t(5;12)(q33;q14)                                                                                                                                                                                                                                                             |
| [11]              | 5 | del(2)(p23p24),dup(2)(q13), <b>t(5;12)(q33;q14)</b> ,del(21)(q21)/ idem,t(1;6)(p36;p23)                                                                                                                                                                                      |
| [1, 13]           | 5 | ins(5;12)(q33;q14q21)                                                                                                                                                                                                                                                        |
| [1, 11,<br>13]    | 5 | t(5;12)(q33;q15)                                                                                                                                                                                                                                                             |
| [13]              | 5 | t(5;12)(q32;q14)                                                                                                                                                                                                                                                             |
| [13]              | 5 | t(5;12)(q32;q15)                                                                                                                                                                                                                                                             |
| [1, 13]           | 5 | ins(12;5)(q15;q33q13)                                                                                                                                                                                                                                                        |
| [4, 13]           | 5 | t(5;12)(q33;q14)                                                                                                                                                                                                                                                             |
| [2, 13]           | 5 | ins(12;5)(q14;q33q13)                                                                                                                                                                                                                                                        |
| [1]               | 5 | <b>t(5;12)(p13;q15)</b> ,del(13)(q14)                                                                                                                                                                                                                                        |
| [1]               | 5 | <b>t(5;12)(q11;q15)</b> ,add(13)(q12),?del(22)(q12)                                                                                                                                                                                                                          |
| [1]               | 5 | ?inv(5)(q14q22), <b>t(5;12)(q31;q14)</b>                                                                                                                                                                                                                                     |
| [1, 13]           | 5 | <b>t(5;12)(q32;q14)</b> /idem, add(2)(p14),add(4)(q21),der(18)t(4;18)(q21;q?21)                                                                                                                                                                                              |
| [1]               | 5 | t(3;7)(p13;p15), <b>t(5;12)(q33;q14)</b>                                                                                                                                                                                                                                     |
| [1]               | 5 | <b>t(5;12)(q33;q14)</b> / idem,der(14;21)(q10;q10)                                                                                                                                                                                                                           |
| [2]               | 5 | t(5;12)(q32-33;q14-15)                                                                                                                                                                                                                                                       |
| [1]               | 5 | <b>t(5;12)(q33;q14)</b> / idem,t(1;6)(p36;p23)                                                                                                                                                                                                                               |
| [1]               | 5 | -1, <b>t(5;12)(q33;q15)</b> ,t(8;12)(q21;p11) ,t(9;15)(p13;q26),del(13)(q22q31) ,<br>der(20)t(1;20)(p32;q11)/idem,+r(1)(p22q44)                                                                                                                                              |
| [1]               | 5 | t(5;12)(q34;q15)                                                                                                                                                                                                                                                             |
| [1]               | 5 | t(5;12)(q34;q14-15)                                                                                                                                                                                                                                                          |
| [4]               | 6 | Ins(6;12)(p23;q15q21)                                                                                                                                                                                                                                                        |

|         |            |                                                                                                                                                                                                                                                     |
|---------|------------|-----------------------------------------------------------------------------------------------------------------------------------------------------------------------------------------------------------------------------------------------------|
| [1]     | 6          | t(6;12)(p21;q14)                                                                                                                                                                                                                                    |
| [1]     | 6          | der(2)t(2;?12)(q3?7;q11)t(?6;12)(p21;q15) ,add(6)(p21) ,-12,+der(?)t(?;12)(?;q15)                                                                                                                                                                   |
| [1]     | 6          | del(1)(p13p22), <b>der(6)t(6;12)(p21-22;q15) ,add(12)(q15)</b>                                                                                                                                                                                      |
| [1]     | 6          | t(6;12)(q21;q15)                                                                                                                                                                                                                                    |
| [1]     | 6          | der(3)t(3;6)(q23;q21) <b>t(6;12)(q27;q14)</b> ,del(6)(q21), <b>der(12)t(3;12)(q23;q14)</b>                                                                                                                                                          |
| [1]     | 7          | dic(7;12)(p21;q15),-12,der(22)ins(22;7)(q13;p21p22),+1-2mar                                                                                                                                                                                         |
| [1]     | 7          | t(5;15)(p14;q14), <b>t(7;12)(p14;q15)</b> ,del(15)(q24)                                                                                                                                                                                             |
| [1]     | 7          | der(4)t(4;7)(p15;p13),del(6)(q15), <b>der(7)t(7;12)(p13;q13)t(?6;12)(q?21;q?21)</b> ,del(12)(q13)                                                                                                                                                   |
| [1]     | 7          | <b>der(7)t(7;12)(q31;q14)</b> ,t(8;22)(p23;q11), <b>der(12)t(7;12)(q31;p13)</b> ,del(12)(q14)                                                                                                                                                       |
| [9]     | 8          | t(8;12)(p22;q14;q22.3-qter)                                                                                                                                                                                                                         |
| [9]     | 8          | t(8;12)(p22;q14;q22)                                                                                                                                                                                                                                |
| [1]     | 8          | der(1)t(1;13)(q21;q14),der(8)t(1;8)(q21;p21),<br><b>der(12)t(8;12)(p21;p13)</b> ,add(13)(q11)                                                                                                                                                       |
| [1]     | 8          | t(8;12)(q13;q15)                                                                                                                                                                                                                                    |
| [1]     | 8          | ins(12;8)(q15;q24q24)                                                                                                                                                                                                                               |
| [1]     | 8          | ins(12;8)(q24;q13q22)                                                                                                                                                                                                                               |
| [14-17] | 9          | t(9;12)(p22;q14)                                                                                                                                                                                                                                    |
| [1]     | 9          | ins(9;12)(p24;q15q23)/47, idem,+der(9)ins(9;12)                                                                                                                                                                                                     |
| [1]     | 9          | t(9;12)(p22;q15)                                                                                                                                                                                                                                    |
| [1]     | 9          | add(6)(q15), <b>der(9)t(9;12)(q22;q15)</b> ,del(10)(q22),der(11)t(11;14)(q23;q24),<br><b>der(12)t(10;12)(q22;q15) ,add(13)(p11),add(14)(q24)</b> ,-17                                                                                               |
| [1]     | 9          | <b>t(9;12)(q33;q14)</b> / -9,der(11)t(9;11)(q3?1;q?21) <b>t(9;12)(q33;q14)</b> ,?der(12)t(9;12),+mar                                                                                                                                                |
| [4]     | 10         | t(10;12)(p11.2;q14 or 15)                                                                                                                                                                                                                           |
| [1]     | 10         | t(10;12)(p15;q15)/idem, +der(12)t(10;12)                                                                                                                                                                                                            |
| [1]     | 10         | t(10;12)(p11;q13)                                                                                                                                                                                                                                   |
| [1]     | 10         | t(10;12)(q25;q15)                                                                                                                                                                                                                                   |
| [1]     | 10         | t(10;12)(q22;q14)                                                                                                                                                                                                                                   |
| [1, 2]  | 10         | t(10;12)(q22;q15)                                                                                                                                                                                                                                   |
| [1, 4]  | 11         | t(11;12)(q13;q14)                                                                                                                                                                                                                                   |
| [1]     | 11         | add(10)(q23), <b>der(11)ins(11;12)(q11;q13q21)</b> del(11)(q11q25),<br><b>der(12)t(11;12)(q11;q24)</b> del(12)(q13q21) add(12)(p11)                                                                                                                 |
| [1]     | 11         | <b>ins(11;12)(q13;q24q15)</b> / idem,del(17)(q23)                                                                                                                                                                                                   |
| [1]     | 11         | der(6)t(6;13)(p21;q12),der(10)t(10;11)(q24;q13), <b>der(11)t(11;12)(q13;q13)</b> ,<br>der(11)t(11;14)(q13;q24), <b>der(12)t(10;12)(q24;q13)</b> ,der(14)t(6;14)(p21;q24),<br>+der(?)t(?;11)(?;q13)/46, idem, del(13)(q22)/46, idem,t(1;16)(p11;p11) |
| [1]     | 11         | t(11;12)(q21;q14)                                                                                                                                                                                                                                   |
| [1]     | 11         | der(11)t(11;12)(q11;p12), <b>der(12)del(12)(q13q15)inv(12)(p12q13)t(12;15)</b><br><b>(q13;q12)</b> ,der(15)t(11;15)(q11;q12)                                                                                                                        |
| [4, 9]  | Intragenic | -12,+der(12)(12qter→12q24.1::12p13→cen→12q13::12q15→12q13::12q15→12q24.1::12p13→12pter)                                                                                                                                                             |
| [1]     | Intragenic | inv(12)(q13q15)                                                                                                                                                                                                                                     |
| [4]     | Intragenic | del(12)(q13q15 or q21)                                                                                                                                                                                                                              |
| [1]     | Intragenic | del(12)(q14q21)                                                                                                                                                                                                                                     |
| [1]     | Intragenic | der(12)t(12;?12)(p13;q15)                                                                                                                                                                                                                           |
| [1]     | Intragenic | inv(12)(p12q15)                                                                                                                                                                                                                                     |
| [1]     | Intragenic | <b>inv(12)(p12q14)</b> /idem,tas(19;21)(p13;p13)                                                                                                                                                                                                    |

|      |            |                                                                                                                                             |
|------|------------|---------------------------------------------------------------------------------------------------------------------------------------------|
| [1]  | Intragenic | der(12)inv(12)(p13q24)inv(12)(p12q15)                                                                                                       |
| [1]  | Intragenic | inv(12)(p11q15)                                                                                                                             |
| [1]  | Intragenic | add(8)(p?11), <b>add(12)(q1?3)</b>                                                                                                          |
| [1]  | Intragenic | der(12)ins(12;?)(q13;?)dup(12)(q13q22)                                                                                                      |
| [1]  | Intragenic | <b>der(12)?ins(12;?)(q13;?)?del(12)(q23)</b> ,del(15)(q12),der(17)t(15;17)(q22;q25)                                                         |
| [1]  | Intragenic | t(1;1)(p13;q42), <b>del(12)</b>                                                                                                             |
| [1]  | Intragenic | dup(12)(q13→q22)                                                                                                                            |
| [1]  | Intragenic | t(12;12)(q14;q23)                                                                                                                           |
| [1]  | Intragenic | der(12)t(12;16;?)(q14-q15;q22;?)                                                                                                            |
| [1]  | Intragenic | Inv(12)(p12q13-q14)                                                                                                                         |
| [4]  | Intragenic | [inv(12)(p11.2q13)],+t(3;inv(12))(der(3)(12pter→12p11.2::12q15→12q13::3p21→cen→3qter);der(12)(12qter→12q15::12p11.2→cen→12q13::3p21→3pter)) |
| [1]  | Intragenic | del(12)(q14q21)                                                                                                                             |
| [1]  | Intragenic | ins(12;12)(q15;q13q15)                                                                                                                      |
| [1]  | Intragenic | +8,+der(12)del(12)(p11p12)del(12)(q13q15)                                                                                                   |
| [1]  | Intragenic | del(4)(q27),der(12)(q13q15)inv(12)(q15q24) t(4;12)(q27;q24)                                                                                 |
| [1]  | Intragenic | der(8)t(8;15)(q22;q22),del(12)(q15) ,der(14)t(12;14)(q15;q22) , add(15)(q22),der(17)t(14;17)(q22;p13)                                       |
| [1]  | Intragenic | add(12)(q15) , +der(?)t(?;12)(?;q15)/49-50,XY,-12,+der(?)t(?;12)(?;q15) , +2mar,inc                                                         |
| [1]  | Intragenic | t(7;18)(q21;q22), <b>ins(12;?)(q15;?)</b>                                                                                                   |
| [1]  | Intragenic | der(1)t(1;12)(p32;p13),der(12)inv(12)(q13q15) t(1;12)(p32;p13)/idem,+7,+19                                                                  |
| [1]  | Intragenic | inv(12)(q13q21)                                                                                                                             |
| [2]  | Intragenic | inv(12)(q14q24)                                                                                                                             |
| [1]  | Intragenic | t(4;13)(q?21;q?14) , <b>?inv(12)(q14q21)/del(6)(q23)</b> , <b>?inv(12)</b>                                                                  |
| [1]  | Intragenic | der(10)t(10;12)(p11;q24),der(12)inv(12)(q13q22) t(10;12)                                                                                    |
| [1]  | Intragenic | der(12)del(12)(q13q13-14)inv(12)(q13-14q23)                                                                                                 |
| [1]  | Intragenic | ?der(5)t(5;21)(q11;q21) , <b>?der(12)ins(12;5)(p13;q35q11)del(12)(q13q23)</b> , <b>?der(21)t(12;21)(q15;q21) del(12)(q23)</b>               |
| [1]  | Intragenic | inv(12)(q15q24)                                                                                                                             |
| [1]  | Intragenic | der(1)inv(1)(p32q25)t(1;9)(p32;q22),der(9)t(1;9),inv(12)(q15q24)                                                                            |
| [1]  | Intragenic | ins(12;12)(q24;q13q24)/46,idem,t(1;6)(p22;q12)                                                                                              |
| [18] | Intragenic | der(12)ins(12;12)(p11;q13-14q15)                                                                                                            |
| [18] | Intragenic | der(12)inv(12)(p13p11)inv(12)(q14q24)                                                                                                       |
| [18] | Intragenic | inv(12)(p11.2q15)                                                                                                                           |
| [1]  | Intragenic | add(12)(q24)                                                                                                                                |
| [19] | Intragenic | +r(12)                                                                                                                                      |
| [20] | Intragenic | t(12;12)(q14;q14)                                                                                                                           |
| [1]  | 13         | t(12;13)(q13;q12)                                                                                                                           |
| [1]  | 13         | t(12;13)(q15;q14)                                                                                                                           |
| [1]  | 13         | der(12)t(12;13)(q15;q21-22) , der(13)t(12;13)(q15;q14)                                                                                      |
| [11] | 13         | t(12;13)(q24;q14)                                                                                                                           |
| [11] | 13         | t(12;13)(q22;q14)                                                                                                                           |
| [11] | 13         | <b>del(12)(q14q14),ins(13;12)(q22;q21q23)</b> ,-del(13)(q31q31)/45,idem,_21/t(13;14)(q14;q32)                                               |
| [21] | 13         | t(12;13)(q14;q13)                                                                                                                           |
| [1]  | 13         | der(12)t(12;13)(q15;q22),der(13)t(12;13)(q15;q14)                                                                                           |

|                                     |      |          |                                                                                                                                        |
|-------------------------------------|------|----------|----------------------------------------------------------------------------------------------------------------------------------------|
|                                     | [1]  | 13       | t(12;13)(q15;q22)                                                                                                                      |
|                                     | [1]  | 13       | t(12;13)(q15;q34)                                                                                                                      |
|                                     | [10] | 13       | t(12;13)(q14;q21-32)                                                                                                                   |
|                                     | [1]  | 14       | t(12;14)(q13;q24)                                                                                                                      |
|                                     | [1]  | 14       | t(12;14)(q15;q22)                                                                                                                      |
|                                     | [9]  | 14       | t(12;14)(q14;q14)                                                                                                                      |
|                                     | [10] | 15       | t(12;15)(q14;q24)                                                                                                                      |
|                                     | [1]  | 16       | t(12;16)(q15;p11)                                                                                                                      |
|                                     | [1]  | 16       | t(12;16)(q15;q22)                                                                                                                      |
|                                     | [4]  | 17       | Inv(7)(p13q22),t(12;17)                                                                                                                |
|                                     | [4]  | 17       | t(12;17)(q14;p13)                                                                                                                      |
|                                     | [4]  | 17       | Inv(7),t(12;17),t(13;15)(p11;q11)                                                                                                      |
|                                     | [1]  | 17       | der(9)t(9;17)(q32;q23),der(12)t(12;17)(q14;p12),der(17)t(12;17)t(9;17)                                                                 |
|                                     | [1]  | 17       | t(12;17)(q13;p11)                                                                                                                      |
|                                     | [1]  | 17       | ins(17;12)(q21-23;q13q14-15)                                                                                                           |
|                                     | [1]  | 18       | t(12;18)(q13;q11)                                                                                                                      |
|                                     | [20] | 18       | t(12;18)(q14;q12)                                                                                                                      |
|                                     | [1]  | 18       | der(12)add(12)(p13)t(12;18)(q13;q21),?der(18)t(12;18)(q13;q12)                                                                         |
|                                     | [1]  | 18       | inv(5)(p15q21),der(12)t(12;18)(p13;q21)t(12;17)(q15;q23),der(17)t(12;17),<br>der(18)t(12;18)                                           |
|                                     | [20] | 18       | t(12;18)(q14~q15;q12~q21)                                                                                                              |
|                                     | [20] | 18       | t(12;18)(q14~q15;q12~q21)                                                                                                              |
|                                     | [20] | 18       | t(12;18)(q14~q15;q12~q21)                                                                                                              |
|                                     | [20] | 18       | t(12;18)(q14~q15;q12~q21)                                                                                                              |
|                                     | [1]  | 20       | t(12;20)(q15;p13)/idem,inv(1)(q24q41)                                                                                                  |
|                                     | [1]  | 20       | t(12;20)(q13;q11), del(13)(q12q22-31)                                                                                                  |
|                                     | [1]  | 20       | t(12;20)(q15;q11)                                                                                                                      |
|                                     | [4]  | 21       | t(12;21)(q13;q21)                                                                                                                      |
|                                     | [4]  | 21       | t(12;21)(q12 or 13;q21)                                                                                                                |
|                                     | [1]  | 21       | t(12;21)(q15;p11)                                                                                                                      |
|                                     | [1]  | 21       | ins(21;12)(q21;q13q15)                                                                                                                 |
|                                     | [1]  | 21       | t(12;21)(q14;q22)/ idem,add(16)(p?)/idem,der(2)t(2;7)(p23;q32),<br>der(7)t(2;7)(p23;q11)                                               |
|                                     | [1]  | 22       | t(1;12)(p32;q24)/46,XY,der(1)t(1;12)(p32;q24),der(12)t(12;22)(q15;q12),<br>der(22)t(12;22) t(1;12)                                     |
|                                     | [1]  | 22       | t(1;12)(p32;q24)/46,XY,der(1)t(1;12)(p32;q24),der(12)t(12;22)(q15;q12),<br>der(22)t(12;22) t(1;12)                                     |
|                                     | [4]  | X        | t(X;12)(q27;q14)<br>t(X;12) with random abnormalities                                                                                  |
|                                     | [1]  | X        | der(X)t(X;12)(p22;q14),der(11)t(11;17)(p11;q21)ins(11;?)(p11;?),<br>der(12)add(12)(p11) t(12;17)(q14;q12),add(17)(q11-12),del(17)(q12) |
|                                     | [1]  | X        | t(X;12)(q24;q24)                                                                                                                       |
| Lipoma (w/ >1 Chromosomal Partners) | [9]  | 7, 13    | t(7;13;12)(p16-p21;q14-q21;q13)                                                                                                        |
|                                     | [1]  | 2, 5, 18 | t(2;12;5;18)(p23;q15;q13;q12)                                                                                                          |
|                                     | [3]  | 1, 19    | t(1;12;19)(p32;q13;q11)                                                                                                                |

|                    |              |            |                                                                                                                                                                                               |
|--------------------|--------------|------------|-----------------------------------------------------------------------------------------------------------------------------------------------------------------------------------------------|
|                    | [4]          | 2, 5, 10   | t(2;5;5;10;12)                                                                                                                                                                                |
|                    | [4]          | 1, 9       | [Inv(12)(p13.3q24.1)],t(1;9;inv(12))(der(1)(12pter→12p13.3::12q24.1→12q13.1::1p36.2→cen→1qter);der(9)(9pter→cen→9q31::1p36.2→1pter);der(12)(12qter→12q24.1::12p13.3→cen→12q13.1::9q31→9qter)) |
|                    | [4]          | 1, 5, 7, 9 | -1,+der(1),-5,+der(5),-7,+der(7),-9,+der(9),-12, <b>der(12)</b>                                                                                                                               |
|                    | [1]          | 1, 4       | <b>der(1)t(1;2)(p13;q13)t(1;12)(q32;q15)</b> ,der(2)t(1;2)(p13;q13),add(4)(q21), <b>der(12)?t(1;12)(q32;p13)t(4;12)(q21;q15)</b> ,?add(15)(q22)                                               |
|                    | [1]          | 1, 14      | der(1)t(1;12)(q42;q15), <b>der(12)t(12;14)(q15;q21)t(1;14)(q42;q24)</b> ,del(14)(q21q24)                                                                                                      |
|                    | [1]          | 2, 5, 3    | t(2;12;5;3)(q11;q13;q33;p14)                                                                                                                                                                  |
|                    | [1]          | 2, 3, 21   | <b>t(2;12;21;3)(q33;q15;q11;p13)</b> ,t(5;22)(q13;q13)                                                                                                                                        |
|                    | [1]          | 3, 13      | t(3;12;13)(q28;q14;q14)                                                                                                                                                                       |
|                    | [1]          | 2, 3       | <b>t(2;3;12)(p24;q28;q15)</b> /idem,del(3)(q11q13)                                                                                                                                            |
|                    | [1]          | 1, 3, 4    | t(1;4;12)(p32;q27;q15), <b>t(3;12)(p23;q15)</b> ,t(5;9)(q31;q32)                                                                                                                              |
|                    | [1]          | 6, 11      | <b>t(6;12;11)(p12;q14;p15)</b> /idem,der(13;15)(q10;q10)                                                                                                                                      |
|                    | [1]          | 3, 6       | t(3;6;12)(q21;q23;q15)                                                                                                                                                                        |
|                    | [1]          | 7, 17      | <b>t(7;12;17)(p15;q14;q25)</b> ,inv(17)(q21q24)                                                                                                                                               |
|                    | [1]          | 3, 8       | t(3;8;12)(p11;p21;q13)                                                                                                                                                                        |
|                    | [1]          | 2, 9       | ?t(2;9;12)(p23;q34;q15),t(3;15)(q21;q22)                                                                                                                                                      |
|                    | [1]          | 2, 16      | t(2;16;12)(p13;q24;q15)                                                                                                                                                                       |
|                    | [1]          | 13, 18     | t(12;13;18)(q15;q14;q21)                                                                                                                                                                      |
|                    | [1]          | 10, 20     | t(1;7)(q32;p22), <b>t(10;20;12)(q22;q11;q15)</b> /t(10;20;12),t(15;17)(q15;p13)                                                                                                               |
|                    | [1]          | 1, 16, 21  | t(1;16;21;12)(p36;q22;q22;q15)                                                                                                                                                                |
| Osteochondrolipoma | [20]         | 18         | t(12;18)(q14~q15;q12~q21)                                                                                                                                                                     |
| Uterine Leiomyoma  | [22]         | 1          | t(1;12)(q32;q14)                                                                                                                                                                              |
|                    | [23]         | 5          | 4,-5,-14,inv(6)(p25q21),t(8;14)(q24;q24), <b>inv(12)(q15q24.1)</b> , <b>+der(12)ins(12;5)(q15;q12q35)</b> ,del(13)(q22q32),+mar                                                               |
|                    | [24]         | 7          | t(7;12)(q31;q14)                                                                                                                                                                              |
|                    | [25, 26]     | 8          | t(8;12)(q22;q14)                                                                                                                                                                              |
|                    | [9]          | 8          | t(8;12)(q22.3;q14)                                                                                                                                                                            |
|                    | [27]         | 9          | r(1),add(2)(p13),add(4)(q21),-8,-9,der(9) <b>t(9;12)(q34;q12)r(9;12)(p22;q24)</b> , del(11)(q23q25),-12,+4mar                                                                                 |
|                    | [9]          | 11         | Ins(12;11)(q14;q21qter)                                                                                                                                                                       |
|                    | [27]         | intragenic | der(2)t(2;14)(q35-36;q24),add(5)(q31),del(7)(q22q32), <b>add(12)(q13-15)</b> , -14,add(17)(q25),inc/38-48,idem,r(1)(p32-34q44)                                                                |
|                    | [28]         | Intragenic | der(12)(q14)                                                                                                                                                                                  |
|                    | [22]         | 14         | t(12;14)(q14;q32)                                                                                                                                                                             |
|                    | [9]          | 14         | t(12;14)(q15;q24)                                                                                                                                                                             |
|                    | [9]          | 14         | t(12;14)(q14-15;q24)                                                                                                                                                                          |
|                    | [27, 29, 30] | 14         | t(12;14)(q14;q24)                                                                                                                                                                             |
|                    | [31]         | 14         | t(12;14)(q15;q11)                                                                                                                                                                             |
|                    | [9]          | 14         | t(12;14)(q16;q24)                                                                                                                                                                             |
|                    | [32, 33]     | 14         | del(1)(q42), <b>t(12;14)(q14;q24)</b>                                                                                                                                                         |
|                    | [32]         | 14         | der(14) <b>t(12;14)(q14-15;q23-24)</b> , der(22)(pter = q11::?)                                                                                                                               |
|                    | [29, 32]     | 14         | t(12;14)(q14-15;q23-24)                                                                                                                                                                       |
|                    | [22]         | 14         | t(12;14)(q14;q23-24)                                                                                                                                                                          |

|                                                            |      |            |                                                                                                                                                                                                                                                                                                                                          |
|------------------------------------------------------------|------|------------|------------------------------------------------------------------------------------------------------------------------------------------------------------------------------------------------------------------------------------------------------------------------------------------------------------------------------------------|
|                                                            | [32] | 14         | t(12;14)(q14-15;q23-24),der(1)t(1;2)(p32;q22),-2,t(12;14)(q14-15;q23-24),-13,der(21)t(13;21)(q12;q22)                                                                                                                                                                                                                                    |
|                                                            | [32] | 14         | t(12;14)(q13;q32). ish der(12)del(12)(q15)t(12;14)(q13;q32)(HMGIC-,wpc12+, wpc14+),der(14)ins(14;12)(q23-24;q15)t(12;14)(q13;q32)(HMGIC+,wpc12+, wpc14+)                                                                                                                                                                                 |
|                                                            | [32] | 14         | der(1;2)(q?;q?),-10,t(12;14)(q15;q23-24),-14,add(21)(p11),+mar r1,+mar2 cp                                                                                                                                                                                                                                                               |
|                                                            | [33] | 14         | r(1),t(4;6)(p16;q21), der(12)inv(12)(p13q11)ins(12)t(12;14)(q15;q21q24), del(14)(q21q24)                                                                                                                                                                                                                                                 |
|                                                            | [23] | 14         | r(1)(p34q32),ins(8;9)(q13;q13q22),t(12;14)(q14-15;q23-24)                                                                                                                                                                                                                                                                                |
|                                                            | [32] | 14         | der(1;2)(q?;q?),-10,t(12;14)(q15;q23-24),-14,add(21)(p11),+mar r1,+mar2 cp                                                                                                                                                                                                                                                               |
|                                                            | [34] | 14         | del(7)(q22q32),t(12;14)(q15;q24)                                                                                                                                                                                                                                                                                                         |
|                                                            | [27] | 14         | add(3)(p21),der(4)t(3;4)(p21;p12),t(12;14)(q14-15;q23-24)                                                                                                                                                                                                                                                                                |
|                                                            | [27] | 14         | r(?1)(?p32q21),t(12;14)(q14-15;q23-24),der(16)(q12)                                                                                                                                                                                                                                                                                      |
|                                                            | [23] | 14         | +5,+5,+6,+6,+7,+7,+8,+8,+9,+9,+ 10,+ 10,+19,+19,+20,+20,+21,+21,+22,+22,+t(1;?) (p36;?),+t(l;?) (p36;?), +del(3) (q13q26),+del(3)(q13q26),+t(11;17) (q13;q21),+t(11~ 17)(q13;q21), +t(12;14)(q14-15;q23-24), +t(12;14)(q14-15;q23-24),t(14;?)(q24;?),t(14;?)(q24;?), +t(15;?)(q26;?),+t(15;?) (q26;?),+ der(17)t(11;17) (q13;q21), +4mar |
|                                                            | [23] | 16         | r(1),der(2)t(1;2)(q21;p23q13),der(2)t(2;9)(p21;q13),add(5)(q35)*2,+der(5) t(5;15)(q11;q15),-6,-7 ,der(8)t(8;11)(q24;q13),-10,-11,add(15)(p12),der(16)t(12;16)(q13;p13),+20,-22,+r,+mar                                                                                                                                                   |
|                                                            | [9]  | X          | t(X;12)(q22;q15)                                                                                                                                                                                                                                                                                                                         |
|                                                            | [9]  | 2, 3       | t(2;3;12)(q35;p21;q14)                                                                                                                                                                                                                                                                                                                   |
|                                                            | [34] | 2, 3       | t(2;3;12)(q35;p21;q14)                                                                                                                                                                                                                                                                                                                   |
| Lipoblastoma                                               | [35] | 4          | t(4;12)(p16;q14)                                                                                                                                                                                                                                                                                                                         |
| Soft Tissue Chondroma                                      | [36] | 3          | t(3;12)(q27;q15)                                                                                                                                                                                                                                                                                                                         |
|                                                            |      | 4          | ins(4;12)(q3?4;q14q2?3)                                                                                                                                                                                                                                                                                                                  |
|                                                            |      | 17         | add(12)(q13),der(17)t(12;17)(q13;q21)                                                                                                                                                                                                                                                                                                    |
|                                                            |      | 8, X       | der(8)t(8;12)(q11;q15)del(8)(p22),der(12)t(X;12)(q24;q15)                                                                                                                                                                                                                                                                                |
| Skeletal Chondroma                                         | [36] | Intragenic | inv(12)(p12q13)                                                                                                                                                                                                                                                                                                                          |
| Skeletal Chondrosarcoma                                    | [36] | 13         | t(12;13)(q13;p13)                                                                                                                                                                                                                                                                                                                        |
|                                                            |      | 1          | t(1;12)(p36;q13)                                                                                                                                                                                                                                                                                                                         |
|                                                            |      | Intragenic | +der(?)t(?;12)(?;q13) 2                                                                                                                                                                                                                                                                                                                  |
|                                                            |      | 14         | t(12;14)(q13;q24)                                                                                                                                                                                                                                                                                                                        |
|                                                            |      | 1          | der(1)t(1;12)(p36;q13)                                                                                                                                                                                                                                                                                                                   |
| Inflammatory myofibroblastic tumor/myofibroblastic sarcoma |      | 4          | der(4)?t(4;12)(q23;q15),add(10)(q26),der(12)?inv(12)(q?q?)add(12)(q?q15), der(21)t(4;21)(q23;q22),1mar.ishder(4)?t(4;12)(q23;q15)(pcp27E12-142H11),add(10)(q26)(pcp27E12-142H11),der(12)?inv(12)(q?q?)add(12)(q?q15)(pcp27E12-142H12),der(21)t(4;21)(q23;q22),1mar                                                                       |
| Idiopathic Myelofibrosis                                   | [37] | 4          | t(4;12)(q32;q15)                                                                                                                                                                                                                                                                                                                         |
|                                                            |      | 5          | t(5;12)(p14;q15)                                                                                                                                                                                                                                                                                                                         |
| Inflammatory Myofibroblastic Tumor                         | [38] | Intragenic | add(12)(q14)                                                                                                                                                                                                                                                                                                                             |



|                                             |          |            |                                                                                                             |
|---------------------------------------------|----------|------------|-------------------------------------------------------------------------------------------------------------|
| De-differentiated Liposarcoma               | [39]     | 16         | +r(12;16)                                                                                                   |
| Sarcoma                                     | [40]     | Intragenic | t(12;12)(q15;q14)                                                                                           |
|                                             | [40]     | 1          | t(1;12)(p32;q14)                                                                                            |
|                                             | [40]     | Intragenic | t(12;12)(q14;q13)                                                                                           |
|                                             | [40]     | Intragenic | t(12;12)(q14;q12)                                                                                           |
|                                             | [40]     | Intragenic | t(12;12)(q14;q21)                                                                                           |
|                                             | [40]     | 1          | t(1;12)(p32;q14)                                                                                            |
|                                             | [40]     | Intragenic | t(12;12)(q14;q13)                                                                                           |
|                                             | [40]     | 11         | t(11;12)(p11;q14)                                                                                           |
|                                             | [40]     | Intragenic | t(12;12)(q14;q22)                                                                                           |
| Myolipoma                                   | [40]     | 6          | t(6;12)(q24;q14)                                                                                            |
|                                             | [41]     | 9          | t(9;12)(p22;q14)                                                                                            |
| Aggressive angiomyxoma                      | [18, 42] | 5          | der(5)t(5;12)(q31;p11.2),der(12)t(5;12)(q31;p11.2)inv(12)(p11.2q15)                                         |
|                                             | [43]     | Intragenic | der(12)(q14)                                                                                                |
|                                             | [44]     | 21         | t(12;21)(q15;q21.1).isht(12;21)                                                                             |
|                                             | [45]     | 8          | t(8;12)(p12;q15)                                                                                            |
|                                             | [46]     | 1          | t(1;12)(p32;q15)                                                                                            |
| Hyaline Vascular Castleman's Disease (HVCD) | [47]     | 6          | add(1)(q21), <b>der(6)t(6;12) (q23;q15)</b> ,add(7)(p22), -9,inv(9)(p11q13), <b>del(12)(q15)</b> ,+mar      |
| Synovia from Osteoarthritis                 | [48]     | 13         | t(1;14)(q25-27;q13-22),t(2;7)(q23;q36), <b>t(12;13)(q15;q32)</b>                                            |
|                                             | [48]     | X          | <b>t(X;12)(q26;q15)</b> ,add(10)(p11)                                                                       |
|                                             | [48]     | Intragenic | inv(12)(p11q13)                                                                                             |
| Extra-skeletal Osteochondroma               | [49]     | 5          | der(5)t(5;12) (q35;q14~15),der(12)t(5;12)inv(12)(p11q14~15)                                                 |
|                                             | [50]     | Intragenic | inv(12)(qter->q14~15::p11->q13::q14~15->q13::p11->pter) [13]/idem,t(5;13)(q13;p11)                          |
| Periosteal Osteosarcoma                     | [19]     | Intragenic | +r(12)                                                                                                      |
| Spindle Cell Sarcoma                        | [51]     | Intragenic | del(X)(p?11p?22), <b>der(12)(12pter→12q?22::12q?15→q?22::16p11→ 16pter)</b> , <b>-16,+r(12)</b> .           |
| Chondrolipoangioma                          | [52]     | 2, 15      | t(2;12;15) (q37;q13;q26)                                                                                    |
| Pulmonary Chondroid Hamartoma (PCH)         | [18]     | Intragenic | inv(12)(p1.2q15)                                                                                            |
|                                             | [53]     | 1          | der(1)t(1;13)(p22;q32) <b>ins(1;12)(p22;q24.3q15)</b> , <b>del(12)(q15)</b> ,der(13)t(1;13)(p22;q32)        |
|                                             |          | 1          | del(8)(q22), <b>ins(12;1)(q15;p23p13)</b> ,der(15)t(8;15)(q22;q11.2 or q12),ins(17;15)(q21;q11.2 or q12q23) |
|                                             |          | 1          | der(1)t(1;12),der(12)?inv(12)t(1;12)                                                                        |
|                                             |          | 2          | XY,der(2)? <b>t(2;12)(p25;q15)</b> ,del(6)(q15q21), <b>der(12)del(12)(p12)add(12)(q15)</b>                  |

|      |            |                                                                                                                                                           |
|------|------------|-----------------------------------------------------------------------------------------------------------------------------------------------------------|
|      | 2          | der(2)t(2;7)(q33;q36), <b>der(2)t(2;12)(p23;q15)</b> ,der(7)t(2;7)(p23;q36), <b>der(12)t(2;12)(q33;q15)</b>                                               |
|      | 3          | ins(12;3)(q15;q13.2q29)                                                                                                                                   |
|      | 3          | t(3;12)(q27;q15),der(10)add(10)(p15)t(10;21)(q21;q21), der(21)t(10;21)(q21;q21)                                                                           |
|      | 3          | <b>t(3;12)(q29;q15)</b> /idem,del(1)(q2?),der(3)add(3)(p21)dup(3)(q23q29)                                                                                 |
|      | 3          | t(3;12)(q29;q15)                                                                                                                                          |
|      | 3          | t(3;12)(q27;q15)                                                                                                                                          |
|      | 3          | add(X)(q13), <b>der(3)t(3;12;X)</b> , <b>der(12)t(3;12)(q27;q15)</b>                                                                                      |
|      | 3          | ins(3;12)(q27 or q28;q12q21)                                                                                                                              |
|      | 3          | t(3;12)(q12;q15)                                                                                                                                          |
|      | 3          | t(3;12)(q27 or q28;q15)                                                                                                                                   |
| [54] | 3          | t(3;12)(q27;q14-q15)                                                                                                                                      |
| [53] | 3          | t(3;12)(q24 or q25;q15)                                                                                                                                   |
|      | 4          | der(4)t(4;12)(q35;q14),del(12)(q14)                                                                                                                       |
|      | 4          | t(4;12)(q12;q15)                                                                                                                                          |
|      | 4          | t(4;12)(p14;q15)                                                                                                                                          |
|      | 4          | t(4;12)(p15.1 or 15.2;q15)                                                                                                                                |
|      | 5          | del(5)(q22),add(6)(q27), <b>der(12)inv(12)(q13q15)t(5;12)(q22;q13)</b>                                                                                    |
|      | 5          | del(5)(q31), <b>t(5;12)(q31;q15)inv(12)(q15q24.3)</b> ,del(16)(q21q23)                                                                                    |
|      | 5          | X,?t(X;4), <b>t(5;12)(q14 or q15;q15)</b>                                                                                                                 |
|      | 5          | t(5;12)(q34;q14 or q15)                                                                                                                                   |
|      | 6          | t(6;12)(q25;q14)                                                                                                                                          |
|      | 6          | t(6;12)(p21.3;q22)                                                                                                                                        |
|      | 6          | <b>t(6;12)(q22.2;q15)</b> ,t(11;17)(q21;q23)                                                                                                              |
|      | 7          | <b>t(7;12)(p22;q15)</b> ,der(10)t(10;14)(q24;q22),del(14)(q22)                                                                                            |
|      | 7          | <b>der(7)t(7;12)(p13;p11.2)ins(7;14)(p13;q24q11.2)</b> , <b>der(12)del(12)(q14q21)t(7;12)(p13;p11.2)</b> ,del(14)(q11.2q24)                               |
|      | 8          | ins(12;8)(q15;p22p23)                                                                                                                                     |
|      | 8          | t(3;19)(q13;q13.2 or q13.3), <b>der(8)t(8;12)(q22;q15)</b> , <b>add(12)(q15)</b> ,del(15)(q22)                                                            |
|      | 8          | del(8)(p21), <b>der(12)inv(12)t(8;12)</b>                                                                                                                 |
|      | 9          | t(9;12)(p23;q15)                                                                                                                                          |
|      | 10         | ins(12;10)(q15;q11.2q26)                                                                                                                                  |
|      | 10         | der(10)t(10;12)(p15;p13.1), der(12)del(12)(p13.1)inv(12)(p13.1q15)                                                                                        |
|      | 11         | t(11;12)(p15;q15)                                                                                                                                         |
|      | 11         | der(4)t(4;12)(q35;q15),der(7)del(7)(p13)del(7)(q32), der(9)t(7;9)(p13;q34),<br>der(11)t(7;11)(q32;q23), <b>der(12)ins(12)(p13q13q15)t(11;12)(q32;q13)</b> |
|      | 11         | t(11;12)(q13;q15)                                                                                                                                         |
|      | Intragenic | t(1;11)(p31;q25), <b>inv(12)(p12q14)</b>                                                                                                                  |
|      | Intragenic | del(12)(q15q23)                                                                                                                                           |
|      | Intragenic | inv(12)(p11.2q15)                                                                                                                                         |
|      | Intragenic | inv(12)(q15q?)                                                                                                                                            |

|      |            |                                                                                                                 |
|------|------------|-----------------------------------------------------------------------------------------------------------------|
|      | Intragenic | ins(12;12)(q15;q13q15),?inv(12)(p?q?)                                                                           |
|      | Intragenic | der(2)(2pter-.2q37::3q?-.3q?::12q15-.12qter), del(3)(q21), <b>der(12)del(12)(q15)?inv(12)(p?q?)</b>             |
|      | Intragenic | inv(12)?(q15q24.1)                                                                                              |
|      | Intragenic | del(12)(q15q21.2)                                                                                               |
|      | Intragenic | del(12)(q13.1q21.2)                                                                                             |
|      | Intragenic | inv(12)(p12q15)                                                                                                 |
|      | Intragenic | inv(12)(q15q22)                                                                                                 |
|      | Intragenic | der(12)del(12)(q13q15)inv(12)(p11.2 or p12q21)                                                                  |
|      | Intragenic | inv(9)(p13q13), <b>inv(12)(q15q22)</b>                                                                          |
|      | Intragenic | ins(12;12)(q15;q15q22)                                                                                          |
|      | Intragenic | inv(12)(q?q?)                                                                                                   |
|      | Intragenic | der(12)inv(12)(p11.2q15)inv(12)(q15p13)                                                                         |
|      | Intragenic | t(4;11)(p16;q23), <b>inv(12)(p11.2 or p12q15)</b>                                                               |
|      | Intragenic | ins(12;12)(q15;q15q21)                                                                                          |
|      | Intragenic | t(4;11)(p16;q23),inv(12)(p11.2 or p12q15)                                                                       |
| [55] | Intragenic | inv(12)(q14q21-23)                                                                                              |
|      | 13         | del(6)(q24), <b>t(12;13)(q15;q13)</b>                                                                           |
|      | 14         | t(12;14)(q15;q24)                                                                                               |
|      | 14         | der(14)t(12;14)(q15;q24)                                                                                        |
|      | 14         | der(14)ins(14;12)(q24;q13q24.3)inv(12)(q15q?)                                                                   |
|      | 14         | ins(14;12)(q24;q13q24.1),inv(12)(?)                                                                             |
|      | 14         | ins(14;12)(q24;q15q24.1)                                                                                        |
|      | 14         | add(11)(p?), <b>der(12)inv(12)(?)t(12;14),der(14)t(12;14)</b>                                                   |
|      | 14         | +8,+8,t(12;14)(q15;q24)                                                                                         |
|      | 14         | inv(7)(?), <b>t(12;14)(q15;q24)</b>                                                                             |
|      | 14         | add(1)(p32),del(3)(p21), <b>t(12;14)(q15;q21)1mar</b>                                                           |
|      | 14         | der(12)t(12;14)(q15;q22),der(14)t(12;14)(q15;q12 or q13)                                                        |
|      | 14         | ins(12;14)(q15;q22q24)                                                                                          |
|      | 16         | <b>t(12;12;16)(p12;q15;p12 or p13.1),del(22)(q12 or q13)</b>                                                    |
|      | 16         | ins(16;12)(p13.1;q24.1q15)                                                                                      |
|      | 17         | inv(6)(p12q21), <b>der(12)t(12;17)(p12;q23)del(12)(q15), der(17)t(12;17)(q15;q23)</b>                           |
|      | 18         | der(12)inv(12)(q14q22)t(12;18)(q24.1;q21),der(18)t(12;18)(q24.1;q21)                                            |
|      | 20         | der(9)inv(9)(p13q13)del(9)(q22), <b>t(12;20)(q15;q13.2 or q13.3)</b>                                            |
|      | X          | ins(X;12)(p22.1;q13q15)                                                                                         |
|      | X          | t(X;12)(q26;q15)                                                                                                |
|      | X          | t(X;12)(q24;q15)                                                                                                |
|      | Y          | ins(Y;12)(q12;q15q24.1)                                                                                         |
|      | Unknown    | ins(12;?)(q15;?)                                                                                                |
|      | 9, 16      | t(3;6)(p25 or p26;p21.1 or p21.2), <b>der(9)t(9;12)(q34;q15),der(12)t(12;16)(q15;q21),del(16)(q21)</b>          |
|      | 11, 15, 17 | der(11)t(11;17)(q14;p11.2), <b>der(12)t(11;12)(q14;q15), ins(15;12)(q22;q15q22), der(17)t(12;17)(q22;p11.2)</b> |

|                                 |      |              |                                                                                                                                                                          |
|---------------------------------|------|--------------|--------------------------------------------------------------------------------------------------------------------------------------------------------------------------|
|                                 |      | 18, 20       | der(3)del(3)(p11)del(3)(q23), <b>der(12)t(12;20)(q15;p11.2)</b> ,der(18)inv(18)(p13q21)<br><b>t(12;18)(q15;q21)</b> , der(20)(3pter-.3p11::3q23-.37q29::20p11.2-.20qter) |
|                                 |      | 3, 10, 11    | del(3)(q25),der(10)t(10;18)(p11.2;q21.3) <b>t(10;12)(q11.2;q15)</b> , <b>der(12)t(10;12)</b><br><b>(p11.2;p12)t(3;12)(q25;q15)/idem,t(11;12)(q21;q13)</b>                |
|                                 |      | 13, 17       | del(6)(p21.1), <b>der(12)t(12;13)(p12 or p13;q12)t(12;17)(q15;p13)</b> , <b>der(13)t(12;13)</b><br><b>(q15;q12)</b> , der(17)t(6;17)(p21.1;p13)                          |
|                                 |      | 5, 9         | t(5;7)(p15.1;q32),der(6)inv(6)?,t(9;12)(p22;q15)                                                                                                                         |
|                                 |      | 7, 9         | del(5)(q13q31), <b>t(7;12;19)(p14;q13;q13.4)</b>                                                                                                                         |
|                                 |      | Y, 17        | t(Y;12;17)                                                                                                                                                               |
|                                 |      | 13, 18       | -12, <b>der(13)t(12;13)(q13;q12)</b> ,del(14)(q22q24), <b>der(18)t(12;18)(p11.2;p11.1)</b>                                                                               |
| Well-differentiated Liposarcoma | [39] | 4            | +der(4;12)                                                                                                                                                               |
|                                 |      | 1, 4, 10, 15 | +r(1;4;10;12;15)                                                                                                                                                         |
|                                 |      | 1, 4, 10, 15 | +der(1;4;10;12;15)                                                                                                                                                       |
|                                 |      | 11           | +r(11;12)                                                                                                                                                                |
|                                 |      | 13           | +r(12;13)                                                                                                                                                                |
|                                 |      | 1            | +r(1;12)                                                                                                                                                                 |
|                                 |      | 1            | +der(1;12)                                                                                                                                                               |
|                                 |      | Intragenic   | +r(12)                                                                                                                                                                   |
|                                 |      | Intragenic   | +der(12)                                                                                                                                                                 |

## References

1. Bartuma, H.; Hallor, K. H.; Panagopoulos, I.; Collin, A.; Rydholm, A.; Gustafson, P.; Bauer, H. C.; Brosjo, O.; Domanski, H. A.; Mandahl, N.; Mertens, F., Assessment of the clinical and molecular impact of different cytogenetic subgroups in a series of 272 lipomas with abnormal karyotype. *Genes, chromosomes & cancer* **2007**, 46, (6), 594-606.
2. Bartuma, H.; Panagopoulos, I.; Collin, A.; Trombetta, D.; Domanski, H. A.; Mandahl, N.; Mertens, F., Expression levels of HMGA2 in adipocytic tumors correlate with morphologic and cytogenetic subgroups. *Molecular cancer* **2009**, 8, 36-36.
3. Bianchini, L.; Birtwisle, L.; Saada, E.; Bazin, A.; Long, E.; Roussel, J. F.; Michiels, J. F.; Forest, F.; Dani, C.; Myklebost, O.; Birtwisle-Peyrottes, I.; Pedeutour, F., Identification of PPAP2B as a novel recurrent translocation partner gene of HMGA2 in lipomas. *Genes, chromosomes & cancer* **2013**, 52, (6), 580-90.
4. Sreekantaiah, C.; Leong, S. P.; Karakousis, C. P.; McGee, D. L.; Rappaport, W. D.; Villar, H. V.; Neal, D.; Fleming, S.; Wankel, A.; Herrington, P. N.; et al., Cytogenetic profile of 109 lipomas. *Cancer Res* **1991**, 51, (1), 422-33.
5. Broberg, K.; Zhang, M.; Strombeck, B.; Isaksson, M.; Nilsson, M.; Mertens, F.; Mandahl, N.; Panagopoulos, I., Fusion of RDC1 with HMGA2 in lipomas as the result of chromosome aberrations involving 2q35-37 and 12q13-15. *Int J Oncol* **2002**, 21, (2), 321-6.
6. HATANO, H.; MORITA, T.; OGOSE, A.; HOTTA, T.; KOBAYASHI, H.; SEGAWA, H.; UCHIYAMA, T.; TAKENOUCI, T.; SATO, T., Clinicopathological Features of Lipomas with Gene Fusions Involving HMGA2. *Anticancer Research* **2008**, 28, (1B), 535-538.
7. Turc-Carel, C.; Dal Cin, P.; Rao, U.; Karakousis, C.; Sandberg, A. A., Cytogenetic studies of adipose tissue tumors. I. A benign lipoma with reciprocal translocation t(3;12)(q28;q14). *Cancer Genet Cytogenet* **1986**, 23, (4), 283-9.
8. Dal Cin, P.; Turc-Carel, C.; Sandberg, A. A., Consistent involvement of band 12q14 in two different translocations in three lipomas from the same patient. *Cancer Genet Cytogenet* **1988**, 31, (2), 237-40.
9. Schoenmakers, E. F.; Wanschura, S.; Mols, R.; Bullerdiel, J.; Van den Berghe, H.; Van de Ven, W. J., Recurrent rearrangements in the high mobility group protein gene, HMGI-C, in benign mesenchymal tumours. *Nat Genet* **1995**, 10, (4), 436-44.
10. Ashar, H. R.; Fejzo, M. S.; Tkachenko, A.; Zhou, X.; Fletcher, J. A.; Weremowicz, S.; Morton, C. C.; Chada, K., Disruption of the architectural factor HMGI-C: DNA-binding AT hook motifs fused in lipomas to distinct transcriptional regulatory domains. *Cell* **1995**, 82, (1), 57-65.
11. Bartuma, H.; Nord, K. H.; Macchia, G.; Isaksson, M.; Nilsson, J.; Domanski, H. A.; Mandahl, N.; Mertens, F., Gene expression and single nucleotide polymorphism array analyses of spindle cell lipomas and conventional lipomas with 13q14 deletion. *Genes, chromosomes & cancer* **2011**, 50, (8), 619-32.
12. Petit, M. M. R.; Swarts, S.; Bridge, J. A.; Van de Ven, W. J. M., Expression of Reciprocal Fusion Transcripts of the HMGIC and LPP Genes in Parosteal Lipoma. *Cancer Genetics and Cytogenetics* **1998**, 106, (1), 18-23.
13. Nilsson, M.; Mertens, F.; Hoglund, M.; Mandahl, N.; Panagopoulos, I., Truncation and fusion of HMGA2 in lipomas with rearrangements of 5q32-->q33 and 12q14-->q15. *Cytogenet Genome Res* **2006**, 112, (1-2), 60-6.
14. Italiano, A.; Ebran, N.; Attias, R.; Chevallier, A.; Monticelli, I.; Mainguene, C.; Benchimol, D.; Pedeutour, F., NFIB rearrangement in superficial, retroperitoneal, and colonic lipomas with aberrations involving chromosome band 9p22. *Genes, chromosomes & cancer* **2008**, 47, (11), 971-7.
15. Lacaria, M.; El Demellawy, D.; McGowan-Jordan, J., A rare case of pediatric lipoma with t(9;12)(p22;q14) and evidence of HMGA2-NFIB gene fusion. *Cancer Genet* **2017**, 216-217, 100-104.
16. Pierron, A.; Fernandez, C.; Saada, E.; Keslair, F.; Hery, G.; Zattara, H.; Pedeutour, F., HMGA2-NFIB fusion in a pediatric intramuscular lipoma: a novel case of NFIB alteration in a large deep-seated adipocytic tumor. *Cancer Genet Cytogenet* **2009**, 195, (1), 66-70.
17. Nilsson, M.; Panagopoulos, I.; Mertens, F.; Mandahl, N., Fusion of the HMGA2 and NFIB genes in lipoma. *Virchows Arch* **2005**, 447, (5), 855-8.
18. Kazmierczak, B.; Dal Cin, P.; Wanschura, S.; Bartnitzke, S.; Van den Berghe, H.; Bullerdiel, J., Cloning and molecular characterization of part of a new gene fused to HMGIC in mesenchymal tumors. *The American journal of pathology* **1998**, 152, (2), 431-435.
19. Gisselsson, D.; Hoglund, M.; Mertens, F.; Mitelman, F.; Mandahl, N., Chromosomal organization of amplified chromosome 12 sequences in mesenchymal tumors detected by fluorescence in situ hybridization. *Genes, chromosomes & cancer* **1998**, 23, (3), 203-12.
20. Panagopoulos, I.; Gorunova, L.; Bjerkehagen, B.; Lobmaier, I.; Heim, S., The recurrent chromosomal translocation t(12;18)(q14~15;q12~21) causes the fusion gene HMGA2-SETBP1 and HMGA2 expression in lipoma and osteochondrolipoma. *International journal of oncology* **2015**, 47, (3), 884-890.
21. Petit, M. M. R.; Schoenmakers, E. F. P. M.; Huysmans, C.; Geurts, J. M. W.; Mandahl, N.; Van de Ven, W. J. M., LHFP, a Novel Translocation Partner Gene of HMGIC in a Lipoma, Is a Member of a New Family of LHFP-like Genes. *Genomics* **1999**, 57, (3), 438-441.

22. Fejzo, M. S.; Ashar, H. R.; Krauter, K. S.; Powell, W. L.; Rein, M. S.; Weremowicz, S.; Yoon, S.-J.; Kucherlapati, R. S.; Chada, K.; Morton, C. C., Translocation breakpoints upstream of the HMGIC gene in uterine leiomyomata suggest dysregulation of this gene by a mechanism different from that in lipomas. *Genes, Chromosomes and Cancer* **1996**, 17, (1), 1-6.
23. Nilbert, M.; Heim, S.; Mandahl, N.; Flodérus, U. M.; Willén, H.; Mitelman, F., Characteristic chromosome abnormalities, including rearrangements of 6p, del(7q), +12, and t(12;14), in 44 uterine leiomyomas. *Human genetics* **1990**, 85, (6), 605-611.
24. Velagaleti, G. V. N.; Tonk, V. S.; Hakim, N. M.; Wang, X.; Zhang, H.; Erickson-Johnson, M. R.; Medeiros, F.; Oliveira, A. M., Fusion of HMGA2 to COG5 in uterine leiomyoma. *Cancer Genetics and Cytogenetics* **2010**, 202, (1), 11-16.
25. Kurose, K.; Mine, N.; Doi, D.; Ota, Y.; Yoneyama, K.; Konishi, H.; Araki, T.; Emi, M., Novel gene fusion of COX6C at 8q22-23 to HMGIC at 12q15 in a uterine leiomyoma. *Genes, Chromosomes and Cancer* **2000**, 27, (3), 303-307.
26. Mine, N.; Kurose, K.; Nagai, H.; Doi, D.; Ota, Y.; Yoneyama, K.; Konishi, H.; Araki, T.; Emi, M., Gene fusion involving HMGIC is a frequent aberration in uterine leiomyomas. *Journal of human genetics* **2001**, 46, (7), 408-412.
27. Polito, P.; Dal Cin, P.; Kazmierczak, B.; Rogalla, P.; Bullerdiek, J.; Van den Berghe, H., Deletion of HMG17 in uterine leiomyomas with ring chromosome 1. *Cancer Genet Cytogenet* **1999**, 108, (2), 107-9.
28. Kazmierczak, B.; Pohnke, Y.; Bullerdiek, J., Fusion transcripts between the HMGIC gene and RTVL-H-related sequences in mesenchymal tumors without cytogenetic aberrations. *Genomics* **1996**, 38, (2), 223-226.
29. Quade, B. J.; Weremowicz, S.; Neskey, D. M.; Vanni, R.; Ladd, C.; Dal Cin, P.; Morton, C. C., Fusion transcripts involving HMGA2 are not a common molecular mechanism in uterine leiomyomata with rearrangements in 12q15. *Cancer Res* **2003**, 63, (6), 1351-8.
30. Takahashi, T.; Nagai, N.; Oda, H.; Ohama, K.; Kamada, N.; Miyagawa, K., Evidence for RAD51L1/HMGIC fusion in the pathogenesis of uterine leiomyoma. *Genes, Chromosomes and Cancer* **2001**, 30, (2), 196-201.
31. Mine, N.; Kurose, K.; Konishi, H.; Araki, T.; Nagai, H.; Emi, M., Fusion of a sequence from HEI10 (14q11) to the HMGIC gene at 12q15 in a uterine leiomyoma. *Japanese journal of cancer research : Gann* **2001**, 92, (2), 135-139.
32. Gattas, G. J.; Quade, B. J.; Nowak, R. A.; Morton, C. C., HMGIC expression in human adult and fetal tissues and in uterine leiomyomata. *Genes, chromosomes & cancer* **1999**, 25, (4), 316-22.
33. Gross, K. L.; Panhuysen, C. I.; Kleinman, M. S.; Goldhammer, H.; Jones, E. S.; Nassery, N.; Stewart, E. A.; Morton, C. C., Involvement of fumarate hydratase in nonsyndromic uterine leiomyomas: genetic linkage analysis and FISH studies. *Genes, chromosomes & cancer* **2004**, 41, (3), 183-90.
34. Hennig, Y.; Rogalla, P.; Wanschura, S.; Frey, G.; Deichert, U.; Bartnitzke, S.; Bullerdiek, J., HMGIC expressed in a uterine leiomyoma with a deletion of the long arm of chromosome 7 along with a 12q14-15 rearrangement but not in tumors showing del(7) as the sole cytogenetic abnormality. *Cancer genetics and cytogenetics* **1997**, 96, (2), 129-133.
35. Pedeutour, F.; Deville, A.; Steyaert, H.; Ranchere-Vince, D.; Ambrosetti, D.; Sirvent, N., Rearrangement of HMGA2 in a case of infantile lipoblastoma without Plag1 alteration. *Pediatric blood & cancer* **2012**, 58, (5), 798-800.
36. Dahlén, A.; Mertens, F.; Rydholm, A.; Brosjö, O.; Wejde, J.; Mandahl, N.; Panagopoulos, I., Fusion, Disruption, and Expression of HMGA2 in Bone and Soft Tissue Chondromas. *Modern Pathology* **2003**, 16, (11), 1132-1140.
37. Andrieux, J.; Demory, J.-L.; Dupriez, B.; Quief, S.; Plantier, I.; Roumier, C.; Bauters, F.; Lai, J. L.; Kerckaert, J.-P., Dysregulation and overexpression of HMGA2 in myelofibrosis with myeloid metaplasia. *Genes, Chromosomes and Cancer* **2004**, 39, (1), 82-87.
38. Kazmierczak, B.; Dal Cin, P.; Sciot, R.; Van den Berghe, H.; Bullerdiek, J., Inflammatory myofibroblastic tumor with HMGIC rearrangement. *Cancer genetics and cytogenetics* **1999**, 112, (2), 156-160.
39. Pedeutour, F.; Forus, A.; Coindre, J.-M.; Berner, J.-M.; Nicolo, G.; Michiels, J.-F.; Terrier, P.; Ranchere-Vince, D.; Collin, F.; Myklebost, O.; Turc-Carel, C., Structure of the supernumerary ring and giant rod chromosomes in adipose tissue tumors. *Genes, Chromosomes and Cancer* **1999**, 24, (1), 30-41.
40. Hu, X.; Wang, Q.; Tang, M.; Barthel, F.; Amin, S.; Yoshihara, K.; Lang, F. M.; Martinez-Ledesma, E.; Lee, S. H.; Zheng, S.; Verhaak, R. G. W., TumorFusions: an integrative resource for cancer-associated transcript fusions. *Nucleic acids research* **2018**, 46, (D1), D1144-D1149.
41. Panagopoulos, I.; Gorunova, L.; Agostini, A.; Lobmaier, I.; Bjerkehagen, B.; Heim, S., Fusion of the HMGA2 and C9orf92 genes in myolipoma with t(9;12)(p22;q14). *Diagn Pathol* **2016**, 11, 22-22.
42. Kazmierczak, B.; Wanschura, S.; Meyer-Bolte, K.; Caselitz, J.; Meister, P.; Bartnitzke, S.; Van de Ven, W.; Bullerdiek, J., Cytogenic and molecular analysis of an aggressive angiomyxoma. *The American journal of pathology* **1995**, 147, (3), 580-585.

43. Rabban, J. T.; Dal Cin, P.; Oliva, E., HMGA2 rearrangement in a case of vulvar aggressive angiomyxoma. *Int J Gynecol Pathol* **2006**, 25, (4), 403-7.
44. Rawlinson, N. J.; West, W. W.; Nelson, M.; Bridge, J. A., Aggressive angiomyxoma with t(12;21) and HMGA2 rearrangement: report of a case and review of the literature. *Cancer Genetics and Cytogenetics* **2008**, 181, (2), 119-124.
45. Nucci, M. R.; Weremowicz, S.; Neskey, D. M.; Sornberger, K.; Tallini, G.; Morton, C. C.; Quade, B. J., Chromosomal translocation t(8;12) induces aberrant HMGIC expression in aggressive angiomyxoma of the vulva. *Genes, chromosomes & cancer* **2001**, 32, (2), 172-6.
46. Medeiros, F.; Erickson-Johnson, M. R.; Keeney, G. L.; Clayton, A. C.; Nascimento, A. G.; Wang, X.; Oliveira, A. M., Frequency and characterization of HMGA2 and HMGA1 rearrangements in mesenchymal tumors of the lower genital tract. *Genes, chromosomes & cancer* **2007**, 46, (11), 981-90.
47. Cokelaere, K.; Debiec-Rychter, M.; De Wolf-Peeters, C.; Hagemeijer, A.; Sciot, R., Hyaline vascular Castleman's disease with HMGIC rearrangement in follicular dendritic cells: molecular evidence of mesenchymal tumorigenesis. *The American journal of surgical pathology* **2002**, 26, (5), 662-9.
48. Broberg, K.; Hoglund, M.; Limon, J.; Lindstrand, A.; Toksvig-Larsen, S.; Mandahl, N.; Mertens, F., Rearrangement of the neoplasia-associated gene HMGIC in synovia from patients with osteoarthritis. *Genes, chromosomes & cancer* **1999**, 24, (3), 278-82.
49. Panagopoulos, I.; Bjerkehagen, B.; Gorunova, L.; Taksdal, I.; Heim, S., Rearrangement of chromosome bands 12q14~15 causing HMGA2-SOX5 gene fusion and HMGA2 expression in extraskeletal osteochondroma. *Oncol Rep* **2015**, 34, (2), 577-84.
50. Panagopoulos, I.; Bjerkehagen, B.; Gorunova, L.; Taksdal, I.; Heim, S., Rearrangement of chromosome bands 12q14~15 causing HMGA2-SOX5 gene fusion and HMGA2 expression in extraskeletal osteochondroma. *Oncology reports* **2015**, 34, (2), 577-584.
51. Panagopoulos, I.; Bjerkehagen, B.; Gorunova, L.; Berner, J. M.; Boye, K.; Heim, S., Several fusion genes identified by whole transcriptome sequencing in a spindle cell sarcoma with rearrangements of chromosome arm 12q and MDM2 amplification. *Int J Oncol* **2014**, 45, (5), 1829-36.
52. Van Dorpe, J.; Dal Cin, P.; Weremowicz, S.; Van Leuven, F.; de Wever, I.; Van den Berghe, H.; Fletcher, C. D.; Sciot, R., Translocation of the HMGI-C ( HMGA2) gene in a benign mesenchymoma (chondrolipoangioma). *Virchows Arch* **2002**, 440, (5), 485-90.
53. Kazmierczak, B.; Meyer-Bolte, K.; Tran, K. H.; Wöckel, W.; Breightman, I.; Rosigkeit, J.; Bartnitzke, S.; Bullerdiek, J., A high frequency of tumors with rearrangements of genes of the HMGI(Y) family in a series of 191 pulmonary chondroid hamartomas. *Genes, Chromosomes and Cancer* **1999**, 26, (2), 125-133.
54. Rogalla, P.; Kazmierczak, B.; Meyer-Bolte, K.; Tran, K. H.; Bullerdiek, J., The t(3;12)(q27;q14-q15) with underlying HMGIC-LPP fusion is not determining an adipocytic phenotype. *Genes, Chromosomes and Cancer* **1998**, 22, (2), 100-104.
55. Wanschura, S.; Cin, P. D.; Kazmierczak, B.; Bartnitzke, S.; Van den Berghe, H.; Bullerdiek, J., Hidden paracentric inversions of chromosome arm 12q affecting the HMGIC gene. *Genes, Chromosomes and Cancer* **1997**, 18, (4), 322-323.
